# Supplementary material for: Improved broad-spectrum antibiotics against Gram-negative pathogens via darobactin biosynthetic pathway engineering
Source: Royal Society of Chemistry journal article supplement (doi:10.1039/d1sc02725e), 2021-01-01
Supplement: d1sc02725e1.xlsx [file d1sc02725e1.xlsx]

## Sheet: Dar. A titre pNOSO-darABCDE
darobactin A pure standard			E. coli BL21 (DE3) pNOSO-darABCDE
Concentration [mg/L]	AUC EIC [M+2H]2+		AUC EIC [M+2H]2+	Titre [mg/L]
1000	4635793920		87605648	8.86309
1000	4789016576		150254720	15.2013
500	3064831232		150486656	15.2248
500	2976614912		117502088	11.8877
250	1782347904		120582856	12.1994
250	1794250496		147385216	14.911
125	1073745280		142158656	14.3822
125	1049441664		134852480	13.6431
62.5	609413248		138312336	13.9931
62.5	627676992
31.25	325689664		Average	13.3673
31.25	298899360		Standard error	1.9589
15.625	154475776
15.625	158117472
7.8125	65414300
7.8125	66422192
3.90625	23345242
3.90625	23189460
1.95312	5526695
1.95312	5567597
0.976525	588290
0.976525	591973

## Sheet: Dar. A titre darBCD deletions
darobactin A pure standard			E. coli BL21 (DE3) pNOSO-darACDE
Concentration [mg/L]	AUC EIC [M+2H]2+		AUC EIC [M+2H]2+	Titre [mg/L]
1000	4635793920		49576452	5.01567
1000	4789016576		53360088	5.39846
500	3064831232
500	2976614912		Average	5.20706
250	1782347904
250	1794250496		E. coli BL21 (DE3) pNOSO-darABDE
125	1073745280		AUC EIC [M+2H]2+	Titre [mg/L]
125	1049441664		55122336	5.57675
62.5	609413248		56368820	5.70285
62.5	627676992		61597792	6.23187
31.25	325689664		62671652	6.34051
31.25	298899360
15.625	154475776		Average	5.96299
15.625	158117472
7.8125	65414300		E. coli BL21 (DE3) pNOSO-darABCE
7.8125	66422192		AUC EIC [M+2H]2+	Titre [mg/L]
3.90625	23345242		32468422	3.28484
3.90625	23189460		31344794	3.17116
1.95312	5526695		34275044	3.46762
1.95312	5567597		32950134	3.33358
0.976525	588290
0.976525	591973		Average	3.3143

## Sheet: Dar. 9 titre pNOSO-darABCDE-9
darobactin 9 pure standard			E. coli BL21 (DE3) pNOSO-darABCDE-9
Concentration [mg/L]	AUC EIC [M+2H]2+		AUC EIC [M+2H]2+	Titre [mg/L]
1000	6560023552		78001568	3.43176
1000	6616492544		63224648	2.78163
500	4287397888		65147796	2.86624
500	4249883392		82797176	3.64275
250	2723935744		85845008	3.77684
250	2721459456		48754280	2.14499
125	1725648384		50219860	2.20947
125	1736573312		55839692	2.45672
62.5	1077980800		55954432	2.46177
62.5	1098918272		75746992	3.33257
31.25	637818048
31.25	647351104		Average	2.91048
15.625	352425792		Standard error	0.569197
15.625	358051168
7.8125	180513632
7.8125	175387216
3.90625	89602872
3.90625	91854664
1.95312	41041768
1.95312	41393972
0.976525	16265481
0.976525	16277703

## Sheet: IPTG_glucose feeding
E. coli BL21 (DE3) pNOSO-relEdarABCDE
Clone	AUC EIC [M+2H]2+	AUC average	AUC relative to no induction [%]	D(+) glucose [%]	IPTG [nM]
1	2527680	2338453	100	0	0
2	2149226
1	2151627	2220610	94.9606	0	0.1
2	2289593
1	2667618	2156128	92.2032	0	1
2	1644638
1	1967677	2357367	100.809	0	10
2	2747057
1	2534085	2468366	105.556	0.5	0
2	2402647
1	161989	261852	11.1977	1.5	0
2	361716
1	161682	231102	9.88267	5	0
2	300521
