# Supplementary material for: Improved broad-spectrum antibiotics against Gram-negative pathogens via darobactin biosynthetic pathway engineering
Source: Royal Society of Chemistry journal article supplement (doi:10.1039/d1sc02725e), 2021-01-01
Supplement: d1sc02725e2.xlsx [file d1sc02725e2.xlsx]

## Sheet: Strains
Bacterial strain	Genotype	Reference
Cloning strains
E. coli HS996	F-, mcrA, Δ(mrr-hsdRMS-mcrBC), Φ80lacZΔM15, ΔlacX74, recA1, araD139, Δ(ara-leu)7697, galU, galK, rpsL (StrR), endA1, nupG, fhuA::IS2	Invitrogen
E. coli NEB10β	mcrA, spoT1Δ(mrr-hsdRMS-mcrBC), Φ80d(lacZΔM15)recA1, relA1, ΔlacX74, recA1, araD139, Δ(ara-leu)7697, galK16, galE15, rpsL (StrR), endA1, nupG, fhuA	New England Biolabs
E. coli GB05-red	F-, mcrA, Δ(mrr-hsdRMS-mcrBC), Φ80lacZΔM15, ΔlacX74, recA1, araD139, Δ(ara-leu)7697, galU, galK, rpsL (StrR), endA1, nupG, λ-, ΔfhuA, PBAD-gbaA ΔybcC, ΔrecET19	Gene Bridges
E. coli BL21 (DE3)	F–, ompT, gal, dcm, lon, ΔhsdSB(rB–mB–), λ(DE3 [lacI lacUV5-T7p07 ind1 sam7 nin5]), [malB+]K-12(λS)	Invitrogen
E. coli Rosetta2 (DE3)	F–, ompT, gal, dcm, lon, ΔhsdSB(rB–mB–), λ(DE3 [lacI lacUV5-T7p07 ind1 sam7 nin5]), [malB+]K-12(λS)	Merck
E. coli Lemo21 (DE3)	fhuA2 [lon], ompT, gal (λ DE3) [dcm] ΔhsdS/ pLemo(camR) λ DE3 = λ sBamHIo ΔEcoRI-B int::(lacI::PlacUV5::T7 gene1) i21 Δnin5 pLemo = pACYC184-PrhaBAD-lysY	New England Biolabs
E. coli GB05-red pNOSO-darABCDE	E. coli GB05-red with pNOSO-darABCDE, kanR	This work
E. coli GB05-red pNOSO-darABCDEFG	E. coli GB05-red with pNOSO-darABCDEFG, kanR	This work
E. coli HS996 pNOSO-darABCDEFG	E. coli HS996 with pNOSO-darABCDEFG, kanR	This work
E. coli HS996 pNOSO-darACDE-cmR	E. coli HS996 with pNOSO-darACDE, kanR, cmR	This work
E. coli HS996 pNOSO-darABDE-cmR	E. coli HS996 with pNOSO-darABDE, kanR, cmR	This work
E. coli HS996 pNOSO-darABCE-cmR	E. coli HS996 with pNOSO-darABCE, kanR, cmR	This work
E. coli HS996 pNOSO-darABCD-cmR	E. coli HS996 with pNOSO-darABCD, kanR, cmR	This work
E. coli HS996 pNOSO-darABCDEF-cmR	E. coli HS996 with pNOSO-darABCDEF, kanR, cmR	This work
E. coli HS996 pNOSO-darABCDEG-cmR	E. coli HS996 with pNOSO-darABCDEG, kanR, cmR	This work
E. coli HS996 pNOSO-darACDE	E. coli HS996 with pNOSO-darACDE, kanR	This work
E. coli HS996 pNOSO-darABDE	E. coli HS996 with pNOSO-darABDE, kanR	This work
E. coli HS996 pNOSO-darABCE	E. coli HS996 with pNOSO-darABCE, kanR	This work
E. coli HS996 pNOSO-darABCD	E. coli HS996 with pNOSO-darABCD, kanR	This work
E. coli HS996 pNOSO-darABCDEF	E. coli HS996 with pNOSO-darABCDEF, kanR	This work
E. coli HS996 pNOSO-darABCDEG	E. coli HS996 with pNOSO-darABCDEG, kanR	This work
E. coli HS996 pNOSO-darABCDE-A	E. coli HS996 with pNOSO-darABCDE-A, kanR	This work
E. coli HS996 pNOSO-darABCDE-B	E. coli HS996 with pNOSO-darABCDE-B, kanR	This work
E. coli HS996 pNOSO-darABCDE-C	E. coli HS996 with pNOSO-darABCDE-C, kanR	This work
E. coli HS996 pNOSO-darABCDE-D	E. coli HS996 with pNOSO-darABCDE-D, kanR	This work
E. coli HS996 pNOSO-darABCDE-E	E. coli HS996 with pNOSO-darABCDE-E, kanR	This work
E. coli HS996 pNOSO-darABCDE-1	E. coli HS996 with pNOSO-darABCDE-1, kanR	This work
E. coli HS996 pNOSO-darABCDE-2	E. coli HS996 with pNOSO-darABCDE-2, kanR	This work
E. coli HS996 pNOSO-darABCDE-4	E. coli HS996 with pNOSO-darABCDE-4, kanR	This work
E. coli HS996 pNOSO-darABCDE-5	E. coli HS996 with pNOSO-darABCDE-5, kanR	This work
E. coli HS996 pNOSO-darABCDE-6	E. coli HS996 with pNOSO-darABCDE-6, kanR	This work
E. coli HS996 pNOSO-darABCDE-7	E. coli HS996 with pNOSO-darABCDE-7, kanR	This work
E. coli HS996 pNOSO-darABCDE-8	E. coli HS996 with pNOSO-darABCDE-8, kanR	This work
E. coli HS996 pNOSO-darABCDE-9	E. coli HS996 with pNOSO-darABCDE-9, kanR	This work
E. coli HS996 pNOSO-darABCDE-10	E. coli HS996 with pNOSO-darABCDE-10, kanR	This work
E. coli HS996 pNOSO-darABCDE-11	E. coli HS996 with pNOSO-darABCDE-11, kanR	This work
E. coli HS996 pNOSO-darABCDE-12	E. coli HS996 with pNOSO-darABCDE-12, kanR	This work
E. coli HS996 pNOSO-darABCDE-13	E. coli HS996 with pNOSO-darABCDE-13, kanR	This work
E. coli HS996 pNOSO-darABCDE-14	E. coli HS996 with pNOSO-darABCDE-14, kanR	This work
E. coli HS996 pNOSO-darABCDE-15	E. coli HS996 with pNOSO-darABCDE-15, kanR	This work
E. coli HS996 pNOSO-darABCDE-16	E. coli HS996 with pNOSO-darABCDE-16, kanR	This work
E. coli HS996 pNOSO-darABCDE-17	E. coli HS996 with pNOSO-darABCDE-17, kanR	This work
E. coli HS996 pNOSO-darABCDE-18	E. coli HS996 with pNOSO-darABCDE-18, kanR	This work
E. coli HS996 pNOSO-darABCDE-19	E. coli HS996 with pNOSO-darABCDE-19, kanR	This work
E. coli HS996 pNOSO-darABCDE-20	E. coli HS996 with pNOSO-darABCDE-20, kanR	This work
E. coli HS996 pNOSO-darABCDE-21	E. coli HS996 with pNOSO-darABCDE-21, kanR	This work
Heterologous producer strains
E. coli HS996 pUC57-relEdarABCDE	E. coli HS996 with pUC57-relEdarABCDE, ampR	This work
E. coli Lemo21 (DE3) pUC57-relEdarABCDE	E. coli Lemo21 (DE3) with pUC57-relEdarABCDE, ampR	This work
E. coli Rosetta2 (DE3) pUC57-relEdarABCDE	E. coli Rosetta2 (DE3) with pUC57-relEdarABCDE, ampR	This work
E. coli BL21 (DE3) pUC57-relEdarABCDE	E. coli BL21 (DE3) with pUC57-relEdarABCDE, ampR	This work
E. coli BL21 (DE3) pSynbio1-relEdarABCDE	E. coli BL21 (DE3) with pSynbio1-relEdarABCDE, ampR	This work
E. coli BL21 (DE3) pNOSO-relEdarABCDE	E. coli BL21 (DE3) with pNOSO-relEdarABCDE, kanR	This work
E. coli BL21 (DE3) pNOSO-darABCDE	E. coli BL21 (DE3) with pNOSO-darABCDE, kanR	This work
E. coli BL21 (DE3) pNOSO-darACDE	E. coli BL21 (DE3) with pNOSO-darACDE, kanR	This work
E. coli BL21 (DE3) pNOSO-darABDE	E. coli BL21 (DE3) with pNOSO-darABDE, kanR	This work
E. coli BL21 (DE3) pNOSO-darABCE	E. coli BL21 (DE3) with pNOSO-darABCE, kanR	This work
E. coli BL21 (DE3) pNOSO-darABCD	E. coli BL21 (DE3) with pNOSO-darABCD, kanR	This work
E. coli BL21 (DE3) pNOSO-darABCDEF	E. coli BL21 (DE3) with pNOSO-darABCDEF, kanR	This work
E. coli BL21 (DE3) pNOSO-darABCDEG	E. coli BL21 (DE3) with pNOSO-darABCDEG, kanR	This work
E. coli BL21 (DE3) pNOSO-darABCDEFG	E. coli BL21 (DE3) with pNOSO-darABCDEFG, kanR	This work
E. coli BL21 (DE3) pNOSO-darABCDE-A	E. coli BL21 (DE3) with pNOSO-darABCDE-A, kanR	This work
E. coli BL21 (DE3) pNOSO-darABCDE-B	E. coli BL21 (DE3) with pNOSO-darABCDE-B, kanR	This work
E. coli BL21 (DE3) pNOSO-darABCDE-C	E. coli BL21 (DE3) with pNOSO-darABCDE-C, kanR	This work
E. coli BL21 (DE3) pNOSO-darABCDE-D	E. coli BL21 (DE3) with pNOSO-darABCDE-D, kanR	This work
E. coli BL21 (DE3) pNOSO-darABCDE-E	E. coli BL21 (DE3) with pNOSO-darABCDE-E, kanR	This work
E. coli BL21 (DE3) pNOSO-darABCDE-1	E. coli BL21 (DE3) with pNOSO-darABCDE-1, kanR	This work
E. coli BL21 (DE3) pNOSO-darABCDE-2	E. coli BL21 (DE3) with pNOSO-darABCDE-2, kanR	This work
E. coli BL21 (DE3) pNOSO-darABCDE-4	E. coli BL21 (DE3) with pNOSO-darABCDE-4, kanR	This work
E. coli BL21 (DE3) pNOSO-darABCDE-5	E. coli BL21 (DE3) with pNOSO-darABCDE-5, kanR	This work
E. coli BL21 (DE3) pNOSO-darABCDE-6	E. coli BL21 (DE3) with pNOSO-darABCDE-6, kanR	This work
E. coli BL21 (DE3) pNOSO-darABCDE-7	E. coli BL21 (DE3) with pNOSO-darABCDE-7, kanR	This work
E. coli BL21 (DE3) pNOSO-darABCDE-8	E. coli BL21 (DE3) with pNOSO-darABCDE-8, kanR	This work
E. coli BL21 (DE3) pNOSO-darABCDE-9	E. coli BL21 (DE3) with pNOSO-darABCDE-9, kanR	This work
E. coli BL21 (DE3) pNOSO-darABCDE-10	E. coli BL21 (DE3) with pNOSO-darABCDE-10, kanR	This work
E. coli BL21 (DE3) pNOSO-darABCDE-11	E. coli BL21 (DE3) with pNOSO-darABCDE-11, kanR	This work
E. coli BL21 (DE3) pNOSO-darABCDE-12	E. coli BL21 (DE3) with pNOSO-darABCDE-12, kanR	This work
E. coli BL21 (DE3) pNOSO-darABCDE-13	E. coli BL21 (DE3) with pNOSO-darABCDE-13, kanR	This work
E. coli BL21 (DE3) pNOSO-darABCDE-14	E. coli BL21 (DE3) with pNOSO-darABCDE-14, kanR	This work
E. coli BL21 (DE3) pNOSO-darABCDE-15	E. coli BL21 (DE3) with pNOSO-darABCDE-15, kanR	This work
E. coli BL21 (DE3) pNOSO-darABCDE-16	E. coli BL21 (DE3) with pNOSO-darABCDE-16, kanR	This work
E. coli BL21 (DE3) pNOSO-darABCDE-17	E. coli BL21 (DE3) with pNOSO-darABCDE-17, kanR	This work
E. coli BL21 (DE3) pNOSO-darABCDE-18	E. coli BL21 (DE3) with pNOSO-darABCDE-18, kanR	This work
E. coli BL21 (DE3) pNOSO-darABCDE-19	E. coli BL21 (DE3) with pNOSO-darABCDE-19, kanR	This work
E. coli BL21 (DE3) pNOSO-darABCDE-20	E. coli BL21 (DE3) with pNOSO-darABCDE-20, kanR	This work
E. coli BL21 (DE3) pNOSO-darABCDE-21	E. coli BL21 (DE3) with pNOSO-darABCDE-21, kanR	This work
E. coli BL21 (DE3) pHisSUMOTEV-darF	E. coli BL21 (DE3) with pHisSUMOTEV-darF, kanR	This work

## Sheet: Plasmids
Plasmid	Description
pUC57	Non‑integrative plasmid for cloning and heterologous expression experiments in E. coli; pMB1 (derivative) ori, bla (ampR), MCS
pSynbio1	Non‑integrative plasmid for cloning and heterologous expression experiments in E. coli; oriV and trfA from RK2 plasmid, bla (ampR), MCS
pNOSO	Non‑integrative plasmid for cloning and heterologous expression experiments in E. coli; p15A ori, aph(3’)-Ia (ampR)
pHisSUMOTEV	Non-integrative plasmid for protein overexpression experiments in E. coli;
pUC57-relEdarABCDE	Gene synthesis product; modified darobactin BGC (relEdarABCDE) in pUC57
pUC57-darFG	Gene synthesis product; darF and darG in pUC57
pSynbio1-relEdarABCDE	relEdarABCDE cloned into pSynbio 1
pNOSO-relEdarABCDE	relEdarABCDE cloned into pNOSO
pNOSO-darABCDE	relE homologue deleted from pNOSO-relEdarABCDE
pNOSO-darACDE-cmR	darB replaced by cat (mediating cmR) in pNOSO-darABCDE
pNOSO-darABDE-cmR	darC replaced by cat (cmR) in pNOSO-darABCDE
pNOSO-darABCE-cmR	darD replaced by cat (cmR) in pNOSO-darABCDE
pNOSO-darABCD-cmR	darE replaced by cat (cmR) in pNOSO-darABCDE
pNOSO-darABCDEF-cmR	darG replaced by cat (cmR) in pNOSO-darABCDEFG
pNOSO-darABCDEG-cmR	darF replaced by cat (cmR) in pNOSO-darABCDEFG
pNOSO-darACDE	Seamless darB deletion construct after removal of cat (cmR) from pNOSO-darACDE-cmR
pNOSO-darABDE	Seamless darC deletion construct after removal of cat (cmR) from pNOSO-darABDE-cmR
pNOSO-darABCE	Seamless darD deletion construct after removal of cat (cmR) from pNOSO-darABCE-cmR
pNOSO-darABCD	Seamless darE deletion construct after removal of cat (cmR) from pNOSO-darABCD-cmR
pNOSO-darABCDEF	Seamless darG deletion construct after removal of cat (cmR) from pNOSO-darABCDEF-cmR
pNOSO-darABCDEG	Seamless darF deletion construct after removal of cat (cmR) from pNOSO-darABCDEG-cmR
pNOSO-darABCDEFG	darFG cloned into pNOSO-darABCDE
pNOSO-darABCDE-A	Native darA sequence replaced by darA-A in pNOSO-darABCDE
pNOSO-darABCDE-B	Native darA sequence replaced by darA-B in pNOSO-darABCDE
pNOSO-darABCDE-C	Native darA sequence replaced by darA-C in pNOSO-darABCDE
pNOSO-darABCDE-D	Native darA sequence replaced by darA-D in pNOSO-darABCDE
pNOSO-darABCDE-E	Native darA sequence replaced by darA-E in pNOSO-darABCDE
pNOSO-darABCDE-1	Native darA sequence replaced by darA-1 in pNOSO-darABCDE
pNOSO-darABCDE-2	Native darA sequence replaced by darA-2 in pNOSO-darABCDE
pNOSO-darABCDE-4	Native darA sequence replaced by darA-4 in pNOSO-darABCDE
pNOSO-darABCDE-5	Native darA sequence replaced by darA-5 in pNOSO-darABCDE
pNOSO-darABCDE-6	Native darA sequence replaced by darA-6 in pNOSO-darABCDE
pNOSO-darABCDE-7	Native darA sequence replaced by darA-7 in pNOSO-darABCDE
pNOSO-darABCDE-8	Native darA sequence replaced by darA-8 in pNOSO-darABCDE
pNOSO-darABCDE-9	Native darA sequence replaced by darA-9 in pNOSO-darABCDE
pNOSO-darABCDE-10	Native darA sequence replaced by darA-10 in pNOSO-darABCDE
pNOSO-darABCDE-11	Native darA sequence replaced by darA-11 in pNOSO-darABCDE
pNOSO-darABCDE-12	Native darA sequence replaced by darA-12 in pNOSO-darABCDE
pNOSO-darABCDE-13	Native darA sequence replaced by darA-13 in pNOSO-darABCDE
pNOSO-darABCDE-14	Native darA sequence replaced by darA-14 in pNOSO-darABCDE
pNOSO-darABCDE-15	Native darA sequence replaced by darA-15 in pNOSO-darABCDE
pNOSO-darABCDE-16	Native darA sequence replaced by darA-16 in pNOSO-darABCDE
pNOSO-darABCDE-17	Native darA sequence replaced by darA-17 in pNOSO-darABCDE
pNOSO-darABCDE-18	Native darA sequence replaced by darA-18 in pNOSO-darABCDE
pNOSO-darABCDE-19	Native darA sequence replaced by darA-19 in pNOSO-darABCDE
pNOSO-darABCDE-20	Native darA sequence replaced by darA-20 in pNOSO-darABCDE
pNOSO-darABCDE-21	Native darA sequence replaced by darA-21 in pNOSO-darABCDE
pHisSUMOTEV-darF	darF in pHisSUMOTEV for DarF protein overexpression

## Sheet: Accession numbers
Gene synthesis fragment / expression construct	GenBank accession number
pNOSO-relEdarABCDE	MZ277221
darA-B	MZ277216
darA-C	MZ277217
darA-D	MZ277218
darA-E	MZ277219
darA-1	MZ277196
darA-2	MZ277197
darA-4	MZ277198
darA-5	MZ277199
darA-6	MZ277200
darA-7	MZ277201
darA-8	MZ277202
darA-9	MZ277203
darA-10	MZ277204
darA-11	MZ277205
darA-12	MZ277206
darA-13	MZ277207
darA-14	MZ277208
darA-15	MZ277209
darA-16	MZ277210
darA-17	MZ277211
darA-18	MZ277212
darA-19	MZ277213
darA-20	MZ277214
darA-21	MZ277215
darFG	MZ277220

## Sheet: DarF BLAST results
Description	Scientific Name	Max Score	Total Score	Query Cover	E value	Per. ident	Acc. Len	Accession
hypothetical protein [Pseudoalteromonas luteoviolacea]	Pseudoalteromonas luteoviolacea	733	733	1	0	100	354	WP_046357643.1
hypothetical protein [Pseudoalteromonas luteoviolacea]	Pseudoalteromonas luteoviolacea	634	634	1	0	85.31	354	WP_063364329.1
hypothetical protein [Pseudoalteromonas sp. JC3]	Pseudoalteromonas sp. JC3	438	438	1	2e-150	57.06	358	WP_206472738.1
MULTISPECIES: hypothetical protein [Pseudoalteromonas]	Pseudoalteromonas	436	436	1	1e-149	56.78	358	WP_010604507.1
hypothetical protein [Pseudoalteromonas sp. JC28]	Pseudoalteromonas sp. JC28	436	436	1	2e-149	56.78	358	WP_174169036.1
hypothetical protein [Pseudoalteromonas sp. M8]	Pseudoalteromonas sp. M8	435	435	1	2e-149	56.78	358	WP_211868668.1
hypothetical protein [Gammaproteobacteria bacterium]	Gammaproteobacteria bacterium	332	332	1	1e-108	45.38	350	MBU1619670.1
hypothetical protein DM484_06005 [Candidatus Methyloumidiphilus alinensis]	Candidatus Methyloumidiphilus alinensis	104	104	0.45	3e-21	33.95	367	PZN82699.1
hypothetical protein [Sphingobium sp. H33]	Sphingobium sp. H33	100	100	0.66	9e-20	27.98	355	WP_214624301.1
hypothetical protein [Phormidium tenue]	Phormidium tenue	99.8	99.8	0.47	2e-19	36.47	357	WP_073609713.1
hypothetical protein [Erythrobacter sp. JK5]	Erythrobacter sp. JK5	93.2	93.2	0.67	4e-17	26.8	357	WP_212451278.1
hypothetical protein [Sphingomonas sp. Cra20]	Sphingomonas sp. Cra20	90.9	90.9	0.44	2e-16	31.29	359	WP_158298686.1
hypothetical protein CVN68_02970 [Sphingomonas sp. Cra20]	Sphingomonas sp. Cra20	90.5	90.5	0.42	6e-16	31.68	455	ATY31073.1
hypothetical protein B1H29_33230 [Streptomyces pactum]	Streptomyces pactum	87.8	87.8	0.49	3e-15	32.04	353	AQS71105.1
hypothetical protein [Streptomyces pactum]	Streptomyces pactum	87.4	87.4	0.49	4e-15	32.04	374	WP_159027867.1
HEXXH motif domain-containing protein [Streptomyces davaonensis]	Streptomyces davaonensis	86.3	86.3	0.54	1e-14	30.3	374	WP_015655217.1
hypothetical protein NIES30_17430 [Phormidium tenue NIES-30]	Phormidium tenue NIES-30	85.9	85.9	0.39	1e-14	32.69	359	OKH46084.1
hypothetical protein [Phormidium tenue]	Phormidium tenue	85.9	85.9	0.39	2e-14	32.69	378	WP_171973057.1
hypothetical protein [Sphingomonas pituitosa]	Sphingomonas pituitosa	85.1	85.1	0.47	3e-14	29.48	383	WP_066723769.1
HEXXH motif domain-containing protein [Streptomyces sp. WM4235]	Streptomyces sp. WM4235	82.8	82.8	0.49	5e-14	29.83	263	WP_053678337.1
hypothetical protein [Streptomyces sp. sk2.1]	Streptomyces sp. sk2.1	84	84	0.54	6e-14	29.8	374	WP_187438972.1
hypothetical protein EAO76_39200 [Streptomyces sp. sk2.1]	Streptomyces sp. sk2.1	84	84	0.54	9e-14	29.8	440	TXS64176.1
hypothetical protein [Cupriavidus yeoncheonensis]	Cupriavidus yeoncheonensis	82	82	0.61	1e-13	27.95	273	WP_211949740.1
hypothetical protein [Streptomyces sp. PRKS01-65]	Streptomyces sp. PRKS01-65	82.4	82.4	0.49	2e-13	30.94	371	WP_164395727.1
hypothetical protein LMG31506_04854 [Cupriavidus yeoncheonensis]	Cupriavidus yeoncheonensis	82	82	0.61	3e-13	27.95	363	CAG2153578.1
hypothetical protein [Streptomyces sp. WAC 01325]	Streptomyces sp. WAC 01325	80.1	80.1	0.54	1e-12	28.79	374	WP_126901253.1
hypothetical protein DMH25_27260 [Streptomyces sp. WAC 01325]	Streptomyces sp. WAC 01325	80.1	80.1	0.54	1e-12	28.79	353	RSN00453.1
hypothetical protein [Sphingobium sp. H33]	Sphingobium sp. H33	79.7	79.7	0.4	2e-12	30.52	368	WP_214624300.1
hypothetical protein [Rhizobium etli]	Rhizobium etli	76.6	76.6	0.42	8e-12	29.94	274	WP_194252247.1
hypothetical protein AYO50_00015 [Acidobacteria bacterium SCGC AG-212-P17]	Acidobacteria bacterium SCGC AG-212-P17	77.4	77.4	0.49	1e-11	29.89	346	OAI57762.1
hypothetical protein [Kordia antarctica]	Kordia antarctica	77.4	77.4	0.33	1e-11	32.79	361	WP_160129608.1
hypothetical protein IE4803_PB00013 [Rhizobium etli bv. phaseoli str. IE4803]	Rhizobium etli bv. phaseoli str. IE4803	77	77	0.42	1e-11	29.94	351	AJC82074.1
hypothetical protein [Alphaproteobacteria bacterium]	Alphaproteobacteria bacterium	77	77	0.53	2e-11	26.6	361	MBN9539553.1
hypothetical protein [Edaphobacter lichenicola]	Edaphobacter lichenicola	77	77	0.41	2e-11	30.97	378	WP_183769177.1
hypothetical protein [Actinoplanes derwentensis]	Actinoplanes derwentensis	76.6	76.6	0.4	2e-11	29.73	392	WP_092541537.1
hypothetical protein [Reyranella sp.]	Reyranella sp.	76.6	76.6	0.51	2e-11	26.74	361	MBR2814100.1
hypothetical protein [Actinoplanes derwentensis]	Actinoplanes derwentensis	75.5	75.5	0.28	6e-11	36.44	385	WP_092541533.1
hypothetical protein [Enhygromyxa salina]	Enhygromyxa salina	74.3	74.3	0.49	6e-11	22.78	298	WP_106390305.1
MULTISPECIES: hypothetical protein [Rhizobium]	Rhizobium	75.1	75.1	0.64	6e-11	24.37	360	WP_168334979.1
hypothetical protein [Rhizobium leguminosarum]	Rhizobium leguminosarum	75.1	75.1	0.64	7e-11	24.37	360	WP_131591355.1
hypothetical protein [Paraburkholderia ultramafica]	Paraburkholderia ultramafica	73.2	73.2	0.44	3e-10	26.54	363	WP_175152617.1
hypothetical protein [Mycobacterium parmense]	Mycobacterium parmense	73.2	73.2	0.41	3e-10	34.16	381	WP_085268556.1
hypothetical protein [Leptolyngbya sp. Heron Island J]	Leptolyngbya sp. Heron Island J	72	72	0.49	6e-10	22.65	379	WP_023072692.1
hypothetical protein [Taibaiella soli]	Taibaiella soli	71.6	71.6	0.84	8e-10	25.8	347	WP_110998292.1
TPA: hypothetical protein [Microscillaceae bacterium]	Microscillaceae bacterium	71.6	71.6	0.42	9e-10	27.33	377	HAS41489.1
hypothetical protein [Collimonas sp. OK242]	Collimonas sp. OK242	71.6	71.6	0.53	9e-10	27.64	349	WP_143036446.1
hypothetical protein SAMN04515617_1415 [Collimonas sp. OK242]	Collimonas sp. OK242	71.2	71.2	0.53	1e-09	27.64	357	SDY98234.1
hypothetical protein [Kitasatospora griseola]	Kitasatospora griseola	70.5	70.5	0.41	2e-09	30.2	323	WP_189278782.1
hypothetical protein GCM10010195_74940 [Kitasatospora griseola]	Kitasatospora griseola	70.5	70.5	0.41	2e-09	30.2	326	GGR09639.1
hypothetical protein [Alphaproteobacteria bacterium]	Alphaproteobacteria bacterium	70.5	70.5	0.32	2e-09	35.59	365	NBB82613.1
hypothetical protein [Nitrosospira sp.]	Nitrosospira sp.	68.9	68.9	0.35	3e-09	32.54	258	MBA4143469.1
hypothetical protein [Sphingomonas sp. Cra20]	Sphingomonas sp. Cra20	70.1	70.1	0.46	3e-09	26.55	385	WP_158298688.1
hypothetical protein [Filimonas sp.]	Filimonas sp.	69.7	69.7	0.42	3e-09	29.27	331	MBN9297037.1
hypothetical protein [Rhizobium lusitanum]	Rhizobium lusitanum	69.7	69.7	0.59	4e-09	26.46	375	WP_183686302.1
hypothetical protein [Enhygromyxa salina]	Enhygromyxa salina	68.9	68.9	0.48	7e-09	25.99	362	WP_106390304.1
hypothetical protein [Polaribacter sp. SM13]	Polaribacter sp. SM13	68.6	68.6	0.42	9e-09	29.56	370	WP_208077608.1
hypothetical protein [Caulobacter henricii]	Caulobacter henricii	68.2	68.2	0.42	1e-08	28	350	WP_145688348.1
hypothetical protein [Mangrovihabitans endophyticus]	Mangrovihabitans endophyticus	66.2	66.2	0.44	5e-08	28.4	358	WP_189077473.1
hypothetical protein GCM10012284_06510 [Mangrovihabitans endophyticus]	Mangrovihabitans endophyticus	66.2	66.2	0.44	5e-08	28.4	355	GGK75243.1
hypothetical protein [Paludibacterium purpuratum]	Paludibacterium purpuratum	66.2	66.2	0.33	5e-08	32.52	355	WP_133678012.1
hypothetical protein [Rhizobium sp. NZLR1]	Rhizobium sp. NZLR1	66.2	66.2	0.33	6e-08	30.65	360	WP_207583160.1
hypothetical protein [Tenacibaculum caenipelagi]	Tenacibaculum caenipelagi	66.2	66.2	0.67	6e-08	24	363	WP_133536057.1
MULTISPECIES: hypothetical protein [unclassified Flavobacterium]	unclassified Flavobacterium	63.9	63.9	0.36	3e-07	33.09	354	WP_089351982.1
hypothetical protein [Tenacibaculum discolor]	Tenacibaculum discolor	63.9	63.9	0.28	4e-07	31.43	367	WP_121145635.1
hypothetical protein [Flavobacterium pectinovorum]	Flavobacterium pectinovorum	63.2	63.2	0.36	6e-07	31.11	354	WP_140507147.1
hypothetical protein [Flavobacterium cupreum]	Flavobacterium cupreum	62	62	0.36	1e-06	33.09	354	WP_127340421.1
hypothetical protein [Sphingomonas pituitosa]	Sphingomonas pituitosa	61.6	61.6	0.35	2e-06	29.71	386	WP_066723763.1
hypothetical protein [Chitinophaga sp.]	Chitinophaga sp.	61.6	61.6	0.36	2e-06	29.85	376	MBO9732451.1
hypothetical protein [Polaribacter sp. SM13]	Polaribacter sp. SM13	60.8	60.8	0.24	4e-06	38.04	367	WP_208077609.1
hypothetical protein [Chitinimonas sp. BJB300]	Chitinimonas sp. BJB300	60.5	60.5	0.45	4e-06	25.88	349	WP_099406458.1
hypothetical protein [Chryseobacterium indologenes]	Chryseobacterium indologenes	60.1	60.1	0.36	6e-06	30.37	354	WP_062702674.1
hypothetical protein [Flavobacterium sp. ABG]	Flavobacterium sp. ABG	60.1	60.1	0.32	6e-06	32.2	354	WP_047774383.1
radical SAM protein [Enhygromyxa salina]	Enhygromyxa salina	60.5	60.5	0.48	7e-06	24.73	773	WP_052548853.1
hypothetical protein CIK05_01285 [Bdellovibrio sp. qaytius]	Bdellovibrio sp. qaytius	59.3	59.3	0.67	1e-05	22.9	381	AZZ35488.1
hypothetical protein [Actinoplanes nipponensis]	Actinoplanes nipponensis	58.5	58.5	0.4	2e-05	23.84	347	WP_203776363.1
hypothetical protein DK842_05570 [Chromobacterium phragmitis]	Chromobacterium phragmitis	55.8	55.8	0.28	6e-05	28.04	229	AXE29418.1
hypothetical protein [Hymenobacter baengnokdamensis]	Hymenobacter baengnokdamensis	56.6	56.6	0.36	9e-05	28.15	404	WP_151088600.1
hypothetical protein [Enterovibrio sp. CAIM 600]	Enterovibrio sp. CAIM 600	55.5	55.5	0.35	0.0002	28.57	338	WP_129122078.1
hypothetical protein [Chromobacterium violaceum]	Chromobacterium violaceum	55.1	55.1	0.51	0.0002	23.74	331	WP_081571842.1
hypothetical protein [Chromobacterium violaceum]	Chromobacterium violaceum	55.1	55.1	0.51	0.0002	23.74	331	WP_045050150.1
hypothetical protein [Chromobacterium violaceum]	Chromobacterium violaceum	55.1	55.1	0.51	0.0002	23.74	331	WP_043595424.1
hypothetical protein CV_0754 [Chromobacterium violaceum ATCC 12472]	Chromobacterium violaceum ATCC 12472	54.7	54.7	0.51	0.0003	23.74	342	AAQ58430.1
hypothetical protein [Chromobacterium violaceum]	Chromobacterium violaceum	54.7	54.7	0.51	0.0003	23.74	331	WP_081527046.1
hypothetical protein [Chromobacterium violaceum]	Chromobacterium violaceum	54.3	54.3	0.51	0.0004	23.74	331	WP_168227401.1
hypothetical protein [Chromobacterium violaceum]	Chromobacterium violaceum	54.3	54.3	0.28	0.0004	28.04	331	WP_210542632.1
hypothetical protein [Chromobacterium violaceum]	Chromobacterium violaceum	54.3	54.3	0.28	0.0004	28.04	331	WP_076225349.1
hypothetical protein [Chromobacterium violaceum]	Chromobacterium violaceum	53.9	53.9	0.28	0.0005	28.04	331	WP_081541983.1
hypothetical protein [Chromobacterium violaceum]	Chromobacterium violaceum	53.9	53.9	0.28	0.0005	28.04	331	WP_048404439.1
hypothetical protein [Chromobacterium violaceum]	Chromobacterium violaceum	53.9	53.9	0.28	0.0005	28.04	331	WP_214757343.1
hypothetical protein [Chromobacterium phragmitis]	Chromobacterium phragmitis	53.9	53.9	0.28	0.0005	28.04	332	WP_145963973.1
hypothetical protein CKJ65_25135 [Mycobacterium intracellulare]	Mycobacterium intracellulare	52	52	0.3	0.0007	26.13	180	PBA28996.1
hypothetical protein [Granulicella sp. dw_53]	Granulicella sp. dw_53	53.5	53.5	0.52	0.0008	23.68	320	WP_213807388.1
hypothetical protein [Candidatus Paracaedibacter symbiosus]	Candidatus Paracaedibacter symbiosus	52.8	52.8	0.45	0.001	28.4	363	WP_198027314.1
hypothetical protein [Pedobacter cryoconitis]	Pedobacter cryoconitis	52.8	52.8	0.18	0.002	32.86	383	WP_111634922.1
hypothetical protein [Xanthomonas arboricola]	Xanthomonas arboricola	52.8	52.8	0.41	0.002	25.16	413	WP_047127874.1
hypothetical protein [Mycobacterium intracellulare]	Mycobacterium intracellulare	52.4	52.4	0.3	0.002	26.13	336	WP_179293546.1
hypothetical protein [Xanthomonas arboricola]	Xanthomonas arboricola	52	52	0.33	0.002	28	344	WP_104613400.1
hypothetical protein [Xanthomonas arboricola]	Xanthomonas arboricola	52	52	0.33	0.002	28	413	WP_065047119.1
MULTISPECIES: hypothetical protein [Xanthomonas]	Xanthomonas	52	52	0.33	0.003	28	413	WP_039528869.1
hypothetical protein [Xanthomonas arboricola]	Xanthomonas arboricola	52	52	0.33	0.003	28	413	WP_115510243.1

## Sheet: DarF HHpred results
Hit	Name	Probability	E-value	Score	SS	Aligned cols	Target Length
3CQB_A	Probable protease htpX homolog; Heat shock protein HtpX domain, PSI-2, Protein Structure Initiative, Structural Genomics	71.17	19	27.38	6.3	78	107
4JIX_A	Projannalysin; Hydrolase, Metallopeptidase Zymogen, Minigluzincin; HET: SO4, GOL; 2.0A {Methanocaldococcus jannaschii}	70.96	11	29.61	4.9	71	112
4QHJ_A	Uncharacterized protein MJ1213; Minigluzincin, Proteolytic enzyme, HYDROLASE; HET: ACT; 1.75A {Methanocaldococcus jannas	70.64	20	27.4	6.3	68	110
6MDW_A	SprT-like domain-containing protein Spartan; DPC repair protease, DNA BINDING PROTEIN; HET: ADP, MLZ, FLC; 1.5A {Homo sa	67.63	7.9	33.7	3.7	33	194
6NCL_c5	P4; tape-measure protein, minor capsid proteins, zip protein, giant virus, VIRUS; 3.5A {Paramecium bursaria Chlorella vi	61.15	120	26.87	9.8	86	181
3C37_B	Peptidase, M48 family; Q74D82, GsR143A, Peptidase, M48 family, Structural Genomics, PSI-2, Protein Structure Initiative,	52.56	57	29.62	6.7	78	253
1G12_A	PEPTIDYL-LYS METALLOENDOPEPTIDASE; zinc cordinate, METALLOPROTEASE, HYDROLASE; HET: MAN; 1.6A {Grifola frondosa} SCOP: d	47.27	52	27.39	5.2	76	167
4JIU_A	Proabylysin; Hydrolase, Metallopeptidase Zymogen, Minigluzincin; 1.15A {Pyrococcus abyssi}	46.99	28	27.13	3.2	36	105
6SAR_A	Beta-barrel assembly-enhancing protease; outer membrane bam complex chaperone protease, CHAPERONE; 2.18A {Escherichia co	46.09	62	32.75	6.4	53	487
5XBN_A	Wss1p; protease, HYDROLASE; HET: MSE; 1.761A {Saccharomyces cerevisiae FostersO}	44.98	130	25.32	7.3	74	148
4AR9_A	COLLAGENASE COLT; HYDROLASE, COLLAGEN, METALLOPROTEASE, PEPTIDASE, COLLAGENOLYSIS; 1.69A {CLOSTRIDIUM TETANI}	42.69	40	33.19	4.3	90	394
4ARF_A	COLH PROTEIN; HYDROLASE-INHIBITOR COMPLEX, COLLAGENOLYSIS, HYDROLYSE, METALLOPROTEASE, HEXXH; 1.77A {CLOSTRIDIUM HISTOLY	41.67	53	32.31	5	92	394
4IL3_B	Ste24p; membrane protein, alpha helical, CaaX Protease, a-factor, structural genomics, MPSBC, PSI-Biology, Membrane Prot	36.6	120	30.29	6.8	76	461
5JIG_A	Ubiquitin and WLM domain-containing metalloprotease SPCC1442.07c; Metalloprotease, DNA-Repair, Endoprotease, Regulation,	31.89	280	22.51	7	74	127
2X3C_A	TOXIC EXTRACELLULAR ENDOPEPTIDASE; HYDROLASE; HET: SO4; 1.99A {AEROMONAS SALMONICIDA SUBSP. ACHROMOGENES}	28.15	210	27.28	6.6	75	343
4L7A_B	Uncharacterized protein; Putative zinc-binding metallo-peptidase, PF15890 family protein, Structural Genomics, Joint Cen	28.15	530	23.63	10.4	83	271
4ARE_A	COLLAGENASE G; HYDROLASE, COLLAGEN, PEPTIDASE, COLLAGENOLYSIS, METALLOPROTEASE; HET: P6G, FLC; 2.19A {CLOSTRIDIUM HISTOL	25.4	130	32.55	4.9	89	695
3CE2_A	Putative peptidase; structural genomics, UNKNOWN FUNCTION, putative peptidase, PSI-2, Protein Structure Initiative, New	25.19	490	26.94	9.1	81	618
2QR4_B	Peptidase M3B, oligoendopeptidase F; structural genomics, oligoendopeptidase F, PSI-2, Protein Structure Initiative, New	23.69	280	28.27	7	81	587
3AHN_B	Oligopeptidase; HYDROLASE, HYDROLASE-HYDROLASE INHIBITOR complex; HET: ACT, 3A1; 1.8A {Geobacillus sp. MO-1}	22.77	500	26.23	8.5	79	564
6R4Z_A	Pro-Pro endopeptidase; Pro-Pro endopeptidase 1, zinc metallopeptidase, Clostridium difficile, virulence factor, HYDROLAS	22.18	370	23.34	6.5	79	198
2L0R_A	Lethal factor; protein, Anthrax Lethal Factor, catalytic domain, Zn metalloprotease, Bacillus Anthracis, HYDROLASE, TOXI	22	70	24.24	1.6	10	106
6GGR_B	Bacteriophage virulence determinant; Protease, Metalloprotease, zinc, METAL BINDING PROTEIN; 2.097A {Mus musculus}	21.95	660	22.77	8.1	87	212
3SKS_A	Putative Oligoendopeptidase F; Structural Genomics, Center for Structural Genomics of Infectious Diseases, CSGID, oligoe	21.15	390	27.05	7.4	87	567
1EB6_A	NEUTRAL PROTEASE II; METALLOPROTEINASE, ZINC, NEUTRAL PROTEASE II, HYDROLASE; HET: EDO; 1.0A {ASPERGILLUS ORYZAE} SCOP:	20.51	62	27.12	1.2	10	177

## Sheet: DarG BLAST results
Description	Scientific Name	Max Score	Total Score	Query Cover	E value	Per. ident	Acc. Len	Accession
hypothetical protein S4054249_24385 [Pseudoalteromonas luteoviolacea]	Pseudoalteromonas luteoviolacea	1174	1174	1	0	100	579	AOT10979.1
ABC transporter ATP-binding protein/permease [Pseudoalteromonas luteoviolacea]	Pseudoalteromonas luteoviolacea	1125	1125	0.95	0	100	555	WP_167354868.1
ABC transporter ATP-binding protein/permease [Pseudoalteromonas luteoviolacea]	Pseudoalteromonas luteoviolacea	884	884	0.99	0	74.39	579	WP_063364334.1
ATP-binding cassette domain-containing protein [Pseudoalteromonas luteoviolacea]	Pseudoalteromonas luteoviolacea	882	882	0.99	0	74.22	579	WP_211036642.1
ATP-binding cassette domain-containing protein [Pseudoalteromonas luteoviolacea]	Pseudoalteromonas luteoviolacea	848	848	0.94	0	75.09	551	WP_211056579.1
ABC transporter ATP-binding protein/permease [Pseudoalteromonas sp. NC201]	Pseudoalteromonas sp. NC201	741	741	0.99	0	62.09	578	WP_102056617.1
ABC transporter ATP-binding protein/permease [Pseudoalteromonas flavipulchra]	Pseudoalteromonas flavipulchra	737	737	0.99	0	61.74	578	WP_010604502.1
ATP-binding cassette domain-containing protein [Pseudoalteromonas sp. M8]	Pseudoalteromonas sp. M8	735	735	0.99	0	62.09	578	WP_211868662.1
MULTISPECIES: ABC transporter ATP-binding protein/permease [unclassified Pseudoalteromonas]	unclassified Pseudoalteromonas	735	735	0.99	0	62.09	578	WP_174169038.1
ABC transporter ATP-binding protein/permease [Vibrio crassostreae]	Vibrio crassostreae	716	716	0.97	0	62.79	573	WP_132715540.1
ATP-binding cassette domain-containing protein [Vibrio crassostreae]	Vibrio crassostreae	716	716	0.97	0	62.79	573	WP_171388244.1
ABC transporter ATP-binding protein/permease [Vibrio lentus]	Vibrio lentus	713	713	0.97	0	62.61	579	WP_192854370.1
ABC transporter ATP-binding protein/permease [Vibrio crassostreae]	Vibrio crassostreae	712	712	0.97	0	62.43	573	WP_132785157.1
ABC transporter ATP-binding protein/permease [Vibrio tasmaniensis]	Vibrio tasmaniensis	693	693	0.97	0	62.79	579	WP_102579770.1
ABC transporter ATP-binding protein/permease [Vibrio coralliirubri]	Vibrio coralliirubri	689	689	0.97	0	62.43	573	WP_048613871.1
ABC transporter ATP-binding protein/permease [Vibrio crassostreae]	Vibrio crassostreae	688	688	0.97	0	62.43	573	WP_048666203.1
ABC transporter ATP-binding protein/permease [Vibrio crassostreae]	Vibrio crassostreae	686	686	0.97	0	61.93	573	WP_132940526.1
ABC transporter ATP-binding protein/permease [Gammaproteobacteria bacterium]	Gammaproteobacteria bacterium	502	502	0.96	6e-169	44.46	567	MBU1619672.1
ATP-binding cassette domain-containing protein [Reinekea forsetii]	Reinekea forsetii	231	231	0.92	5e-64	27.11	603	WP_100257516.1
ATP-binding cassette domain-containing protein [Reinekea sp. G2M2-21]	Reinekea sp. G2M2-21	229	229	0.87	4e-63	28.16	609	WP_196158097.1
ABC transporter ATP-binding protein/permease [Vibrio tetraodonis]	Vibrio tetraodonis	227	227	0.91	1e-62	28.81	607	WP_114783957.1
ABC transporter ATP-binding protein/permease [Vibrio aquimaris]	Vibrio aquimaris	227	227	0.91	2e-62	28.81	609	WP_152432567.1
ATP-binding cassette domain-containing protein [Porticoccaceae bacterium]	Porticoccaceae bacterium	224	224	0.91	1e-61	29	593	MBT5387345.1
ABC transporter ATP-binding protein/permease [Vibrio sp. OCN044]	Vibrio sp. OCN044	225	225	0.91	1e-61	28.44	607	WP_160928598.1
ATP-binding cassette domain-containing protein [Reinekea blandensis]	Reinekea blandensis	223	223	0.89	5e-61	28.14	613	WP_040557485.1
ATP-binding cassette domain-containing protein [Pseudoalteromonas caenipelagi]	Pseudoalteromonas caenipelagi	223	223	0.91	6e-61	28.16	596	WP_171625553.1
ABC transporter, ATP-binding/permease protein [Reinekea sp. MED297] [Reinekea blandensis MED297]	Reinekea blandensis MED297	223	223	0.89	7e-61	28.14	622	EAR09480.1
ABC transporter [Ectothiorhodospira shaposhnikovii]	Ectothiorhodospira shaposhnikovii	223	223	0.81	7e-61	30.8	608	MBK1671752.1
ATP-binding cassette domain-containing protein [Ectothiorhodospira magna]	Ectothiorhodospira magna	223	223	0.81	8e-61	29.69	604	WP_090207436.1
ATP-binding cassette domain-containing protein [Ectothiorhodospira shaposhnikovii]	Ectothiorhodospira shaposhnikovii	223	223	0.81	8e-61	30.8	601	WP_207143379.1
ABC transporter ATP-binding protein/permease [Vibrio xiamenensis]	Vibrio xiamenensis	221	221	0.93	2e-60	26.55	586	WP_093278527.1
ATP-binding cassette domain-containing protein [Pseudoalteromonas sp. S16_S37]	Pseudoalteromonas sp. S16_S37	221	221	0.94	3e-60	27.97	596	WP_190366424.1
ATP-binding cassette domain-containing protein [Pseudoalteromonas sp. MMG012]	Pseudoalteromonas sp. MMG012	219	219	0.91	8e-60	28.75	594	WP_211050815.1
ATP-binding cassette domain-containing protein [Vibrio pectenicida]	Vibrio pectenicida	218	218	0.91	3e-59	27.29	605	WP_171361402.1
ATP-binding cassette domain-containing protein [Pseudoalteromonas sp. MMG005]	Pseudoalteromonas sp. MMG005	218	218	0.91	3e-59	28.75	594	WP_211058842.1
ATP-binding cassette domain-containing protein [Porticoccaceae bacterium]	Porticoccaceae bacterium	217	217	0.92	7e-59	27.59	582	MBT4211922.1
ATP-binding cassette domain-containing protein [Pseudoalteromonas sp. MMG013]	Pseudoalteromonas sp. MMG013	217	217	0.92	1e-58	28.62	594	WP_210996005.1
ATP-binding cassette domain-containing protein [Halobacteria archaeon]	Halobacteria archaeon	217	217	0.94	1e-58	27.22	607	NNJ95163.1
ATP-binding cassette domain-containing protein [Pseudoalteromonas sp. MSK9-3]	Pseudoalteromonas sp. MSK9-3	216	216	0.9	1e-58	29.52	591	WP_119862432.1
ATP-binding cassette domain-containing protein [Ectothiorhodosinus mongolicus]	Ectothiorhodosinus mongolicus	216	216	0.82	1e-58	30.69	595	WP_076755929.1
ATP-binding cassette, subfamily B [Ectothiorhodosinus mongolicus]	Ectothiorhodosinus mongolicus	217	217	0.82	1e-58	30.69	633	SIT69437.1
ATP-binding cassette domain-containing protein [Pseudoalteromonas aurantia]	Pseudoalteromonas aurantia	216	216	0.88	1e-58	29.71	590	WP_138675607.1
ATP-binding cassette domain-containing protein [Porticoccaceae bacterium]	Porticoccaceae bacterium	216	216	0.92	1e-58	27.4	582	MBT7751716.1
ATP-binding cassette domain-containing protein [Pseudoalteromonas aurantia]	Pseudoalteromonas aurantia	216	216	0.88	2e-58	29.71	590	WP_138592565.1
ATP-binding cassette domain-containing protein [Pseudoalteromonas aurantia]	Pseudoalteromonas aurantia	216	216	0.9	2e-58	28.76	594	WP_192506606.1
ATP-binding cassette domain-containing protein [Porticoccaceae bacterium]	Porticoccaceae bacterium	214	214	0.85	3e-58	28.09	528	MBT5103595.1
ATP-binding cassette domain-containing protein [Porticoccaceae bacterium]	Porticoccaceae bacterium	215	215	0.9	4e-58	27.34	592	MBT6105190.1
ATP-binding cassette domain-containing protein [SAR92 clade bacterium]	SAR92 clade bacterium	214	214	0.93	5e-58	27.14	582	MBC8381214.1
ATP-binding cassette domain-containing protein [Vibrio sonorensis]	Vibrio sonorensis	215	215	0.91	5e-58	27.21	601	WP_070971630.1
ATP-binding cassette domain-containing protein [Porticoccaceae bacterium]	Porticoccaceae bacterium	214	214	0.95	1e-57	26.55	584	MBT3620940.1
ABC transporter ATP-binding protein/permease [Vibrio parahaemolyticus]	Vibrio parahaemolyticus	213	213	0.93	2e-57	25.86	586	WP_062907157.1
ABC transporter ATP-binding protein [Oleiphilus sp. HI0065]	Oleiphilus sp. HI0065	212	212	0.89	2e-57	28.36	538	KZY61180.1
ATP-binding cassette domain-containing protein [Saccharospirillum salsuginis]	Saccharospirillum salsuginis	214	214	0.93	2e-57	26.73	608	WP_189610011.1
MULTISPECIES: ABC transporter ATP-binding protein/permease [Vibrio]	Vibrio	213	213	0.93	2e-57	26	586	WP_042520763.1
ABC transporter ATP-binding protein/permease [Vibrio diabolicus]	Vibrio diabolicus	213	213	0.93	2e-57	25.86	586	WP_203347473.1
ABC transporter ATP-binding protein/permease [Vibrio parahaemolyticus]	Vibrio parahaemolyticus	213	213	0.93	2e-57	25.86	586	MBM4974608.1
ATP-binding cassette domain-containing protein [Porticoccaceae bacterium]	Porticoccaceae bacterium	213	213	0.92	2e-57	27.22	582	MBT5004888.1
ABC transporter ATP-binding protein/permease [Vibrio parahaemolyticus]	Vibrio parahaemolyticus	213	213	0.93	2e-57	25.86	586	MBE3762626.1
ATP-binding cassette domain-containing protein [Vibrio pectenicida]	Vibrio pectenicida	213	213	0.91	2e-57	26.92	605	WP_125323276.1
ATP-binding cassette domain-containing protein [Pseudoalteromonas citrea]	Pseudoalteromonas citrea	213	213	0.9	2e-57	29.31	590	WP_138598233.1
ABC transporter ATP-binding protein/permease [Vibrio parahaemolyticus]	Vibrio parahaemolyticus	213	213	0.93	3e-57	25.86	586	WP_086484344.1
ATP-binding cassette domain-containing protein [Algibacillus agarilyticus]	Algibacillus agarilyticus	213	213	0.89	3e-57	27.98	594	WP_111978913.1
ABC transporter ATP-binding protein/permease [Vibrio alginolyticus]	Vibrio alginolyticus	212	212	0.93	3e-57	25.82	586	WP_138940192.1
ATP-binding cassette domain-containing protein [Vibrio alginolyticus]	Vibrio alginolyticus	212	212	0.93	3e-57	25.64	586	WP_213966187.1
MULTISPECIES: ATP-binding cassette domain-containing protein [unclassified Oleiphilus]	unclassified Oleiphilus	213	213	0.96	4e-57	27.83	596	WP_068455961.1
ABC transporter ATP-binding protein/permease [Vibrio alginolyticus]	Vibrio alginolyticus	212	212	0.93	4e-57	25.82	586	WP_149192054.1
ATP-binding cassette domain-containing protein [Vibrio alginolyticus]	Vibrio alginolyticus	212	212	0.93	4e-57	26.18	586	WP_213898360.1
ATP-binding cassette domain-containing protein [Pseudomonadales bacterium]	Pseudomonadales bacterium	213	213	0.85	4e-57	27.89	597	NNL56218.1
ABC transporter ATP-binding protein/permease [Vibrio alginolyticus]	Vibrio alginolyticus	212	212	0.95	4e-57	25.49	586	WP_104976123.1
ABC transporter ATP-binding protein/permease [Vibrio alginolyticus]	Vibrio alginolyticus	212	212	0.93	6e-57	25.82	586	WP_062731004.1
ABC transporter ATP-binding protein/permease [Vibrio alginolyticus]	Vibrio alginolyticus	211	211	0.93	6e-57	26.04	586	EGR0195889.1
ABC transporter ATP-binding protein/permease [Vibrio alginolyticus]	Vibrio alginolyticus	211	211	0.93	7e-57	25.82	586	WP_176311539.1
MULTISPECIES: ABC transporter ATP-binding protein/permease [Vibrio]	Vibrio	211	211	0.93	7e-57	25.5	586	WP_005376462.1
ATP-binding cassette domain-containing protein [Vibrio alginolyticus]	Vibrio alginolyticus	211	211	0.93	8e-57	25.82	586	WP_213910187.1
ABC transporter ATP-binding protein/permease [Vibrio alginolyticus]	Vibrio alginolyticus	211	211	0.93	8e-57	26.04	586	WP_065275262.1
ATP-binding cassette domain-containing protein [Vibrio alginolyticus]	Vibrio alginolyticus	211	211	0.93	9e-57	26	586	WP_213880710.1
ABC transporter ATP-binding protein/permease [Vibrio alginolyticus]	Vibrio alginolyticus	211	211	0.93	9e-57	26	586	WP_182017076.1
ABC transporter ATP-binding protein/permease [Vibrio alginolyticus]	Vibrio alginolyticus	211	211	0.93	1e-56	26.04	586	WP_086047430.1
ATP-binding cassette domain-containing protein [Vibrio sp. Vb0592]	Vibrio sp. Vb0592	211	211	0.93	1e-56	26.04	586	WP_206958818.1
ABC transporter ATP-binding protein/permease [Vibrio parahaemolyticus]	Vibrio parahaemolyticus	211	211	0.93	1e-56	26.04	586	WP_140264948.1
ABC transporter ATP-binding protein/permease [Vibrio parahaemolyticus]	Vibrio parahaemolyticus	211	211	0.93	1e-56	25.68	586	WP_140169437.1
ABC transporter ATP-binding protein [Vibrio parahaemolyticus]	Vibrio parahaemolyticus	211	211	0.93	1e-56	25.86	586	EGR3524409.1
ATP-binding cassette domain-containing protein [Porticoccaceae bacterium]	Porticoccaceae bacterium	211	211	0.93	1e-56	26.73	594	MBT4832896.1
ABC transporter ATP-binding protein/permease [Vibrio alginolyticus]	Vibrio alginolyticus	211	211	0.93	1e-56	25.64	586	EGR1560190.1
ABC transporter ATP-binding protein/permease [Vibrio parahaemolyticus]	Vibrio parahaemolyticus	210	210	0.93	2e-56	25.86	586	EGQ7973190.1
ABC transporter ATP-binding protein/permease [Vibrio sp. ArtGut-C1]	Vibrio sp. ArtGut-C1	210	210	0.93	2e-56	26.04	586	WP_085343708.1
ABC transporter ATP-binding protein/permease [Vibrio diabolicus]	Vibrio diabolicus	210	210	0.93	2e-56	25.86	586	WP_005395185.1
ATP-binding cassette domain-containing protein [Vibrio alginolyticus]	Vibrio alginolyticus	210	210	0.93	2e-56	25.82	586	WP_213871086.1
ABC transporter ATP-binding protein/permease [Vibrio alginolyticus]	Vibrio alginolyticus	210	210	0.93	2e-56	26.04	586	WP_054576018.1
ABC transporter ATP-binding protein/permease [Vibrio alginolyticus]	Vibrio alginolyticus	210	210	0.93	2e-56	25.5	586	WP_203345406.1
ABC transporter ATP-binding protein/permease [Vibrio parahaemolyticus]	Vibrio parahaemolyticus	210	210	0.93	2e-56	25.86	586	MBE4157161.1
ABC transporter ATP-binding protein/permease [Vibrio alginolyticus]	Vibrio alginolyticus	210	210	0.93	2e-56	25.82	586	WP_167416051.1
ABC transporter ATP-binding protein/permease [Vibrio parahaemolyticus]	Vibrio parahaemolyticus	210	210	0.93	2e-56	25.68	586	WP_140088561.1
ATP-binding cassette domain-containing protein [Vibrio alginolyticus]	Vibrio alginolyticus	210	210	0.93	2e-56	25.5	586	WP_171342920.1
ABC transporter ATP-binding protein/permease [Vibrio sp. 1-2 (7-a)]	Vibrio sp. 1-2 (7-a)	210	210	0.93	2e-56	25.86	586	WP_170892645.1
ATP-binding cassette domain-containing protein [Pseudoalteromonas citrea]	Pseudoalteromonas citrea	210	210	0.9	3e-56	28.57	594	WP_010363585.1
ATP-binding cassette domain-containing protein [Vibrio alginolyticus]	Vibrio alginolyticus	210	210	0.93	3e-56	25.82	586	WP_213874243.1
ABC transporter ATP-binding protein/permease [Vibrio rotiferianus]	Vibrio rotiferianus	210	210	0.93	3e-56	25.45	586	WP_143693391.1
ABC transporter ATP-binding protein/permease [Vibrio alginolyticus]	Vibrio alginolyticus	210	210	0.93	3e-56	25.86	586	EGR0269426.1
ABC transporter ATP-binding protein/permease [Vibrio parahaemolyticus]	Vibrio parahaemolyticus	210	210	0.93	3e-56	25.86	586	WP_025526611.1
